# Supplementary material for: CuS–Bi2S3 hierarchical architectures: controlled synthesis and enhanced visible-light photocatalytic performance for dye degradation
Source: Royal Society of Chemistry journal article supplement (doi:10.1039/c5ra02316e), 2015-01-01
Supplement: c5ra02316e1.pdf [file c5ra02316e1.pdf]

## Electronic Supplementary Information

### CuS-Bi<sub>2</sub>S<sub>3</sub> Hierarchical Architectures: Controlled Synthesis and Enhanced Visible-Light Photocatalytic Performance for Dye Degradation

Lang Chen, Jie He, Miao Xiong, Qing Yuan, Yan-Wen Zhang, Fu Wang,  
Sheng-Lian Luo, Chak-Tong Au and Shuang-Feng Yin \*

State Key Laboratory of Chemo/Biosensing and Chemometrics, College of Chemistry  
and Chemical Engineering, Hunan University, Changsha 410082, Hunan, People's  
Republic of China

\* Corresponding author: Phone: 86-731-88821171, Fax: 86-731-88821171,  
E-mail address: [sf\\_yin@hnu.edu.cn](mailto:sf_yin@hnu.edu.cn)

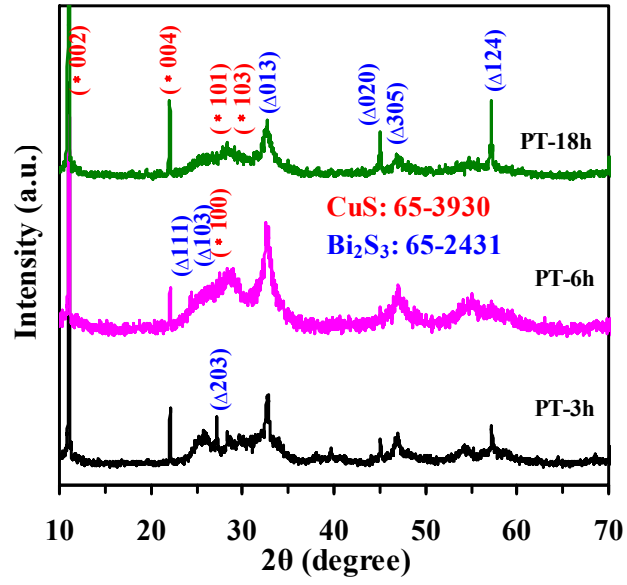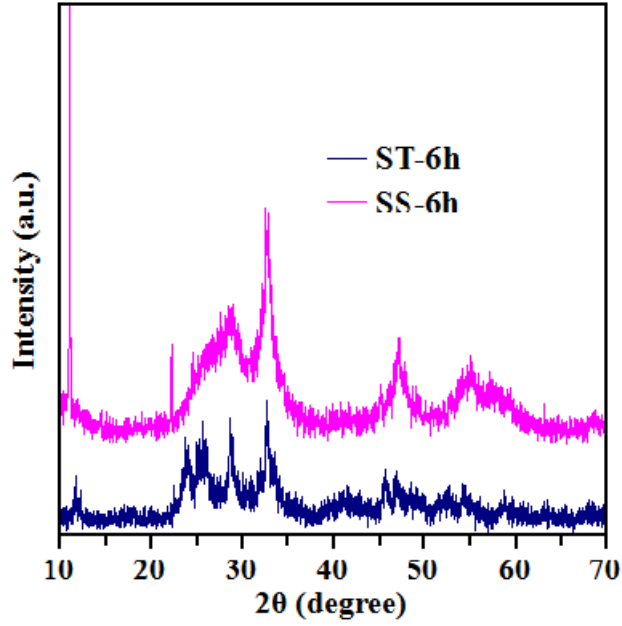

Figure S1. XRD patterns of PT-3h, PT-6h, PT-18h, ST-6h and SS-6h.

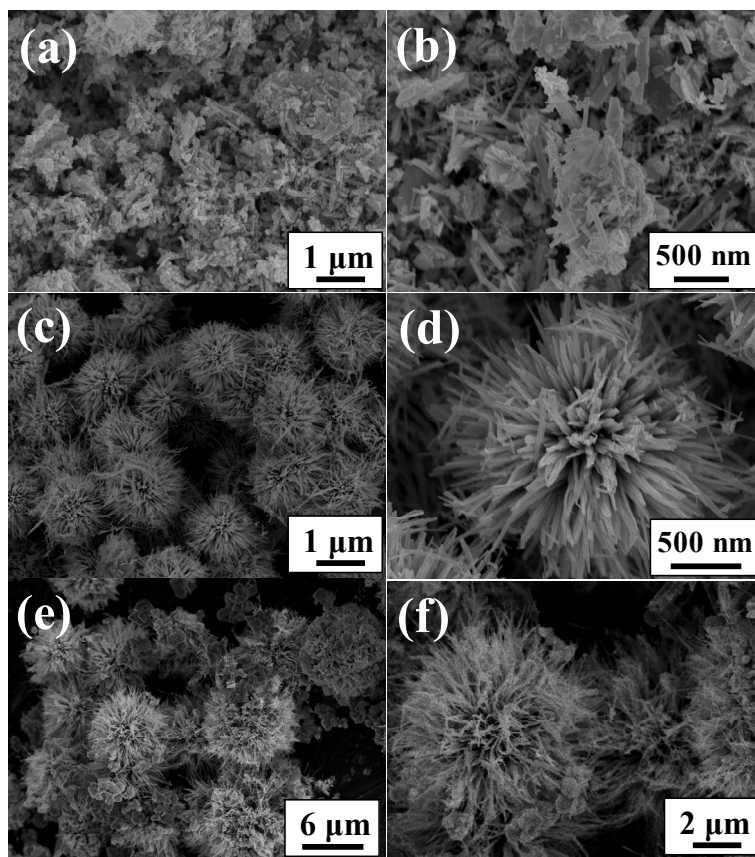

Figure S2. SEM images of (a)(b) TU-3h, (c)(d) TU-6h and (e)(f) TU-18h

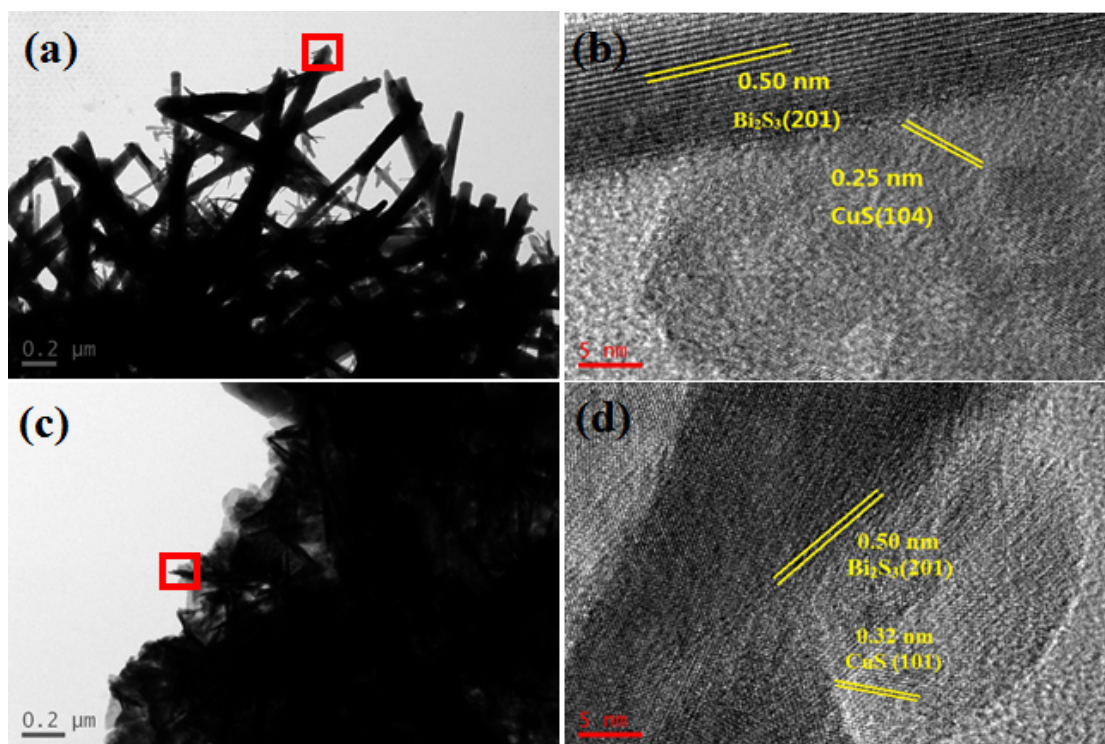

Figure S3. TEM and HRTEM images of composite samples prepared using (a)(b) TU (thiourea) and (c)(d) ST (sodium thiosulfate) as sulfur sources

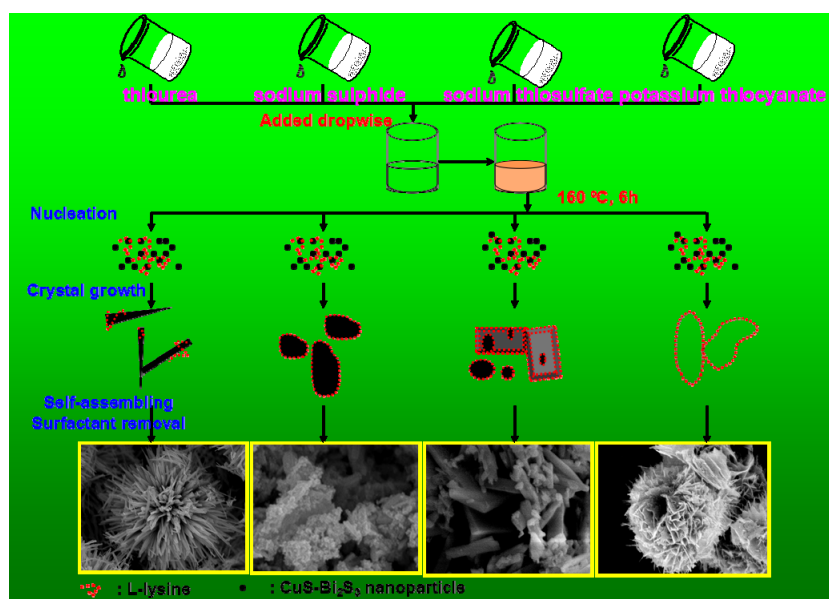

**Figure S4.** Possible growth mechanism for the CuS-Bi<sub>2</sub>S<sub>3</sub> composites using TU (thiourea), SS (sodium sulphide), ST (sodium thiosulfate) and PT (potassium thiocyanate) as sulfur sources.

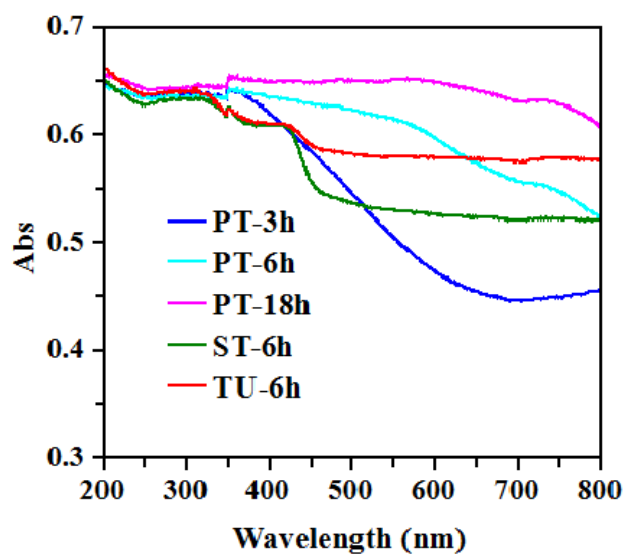

**Figure S5.** UV-vis absorption spectra of PT-3h, PT-6h, PT-18h, ST-6h, and TU-6h

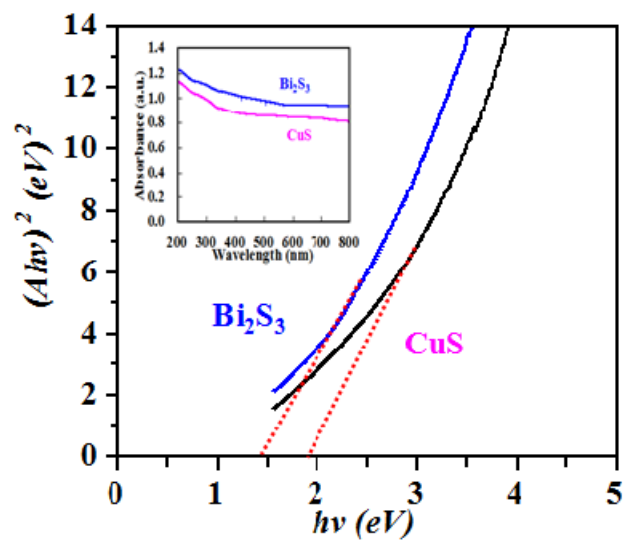

**Figure S6.**  $h\nu-(Ah\nu)^2$  plot of CuS, Bi<sub>2</sub>S<sub>3</sub> and their UV-vis absorption spectra (inset)

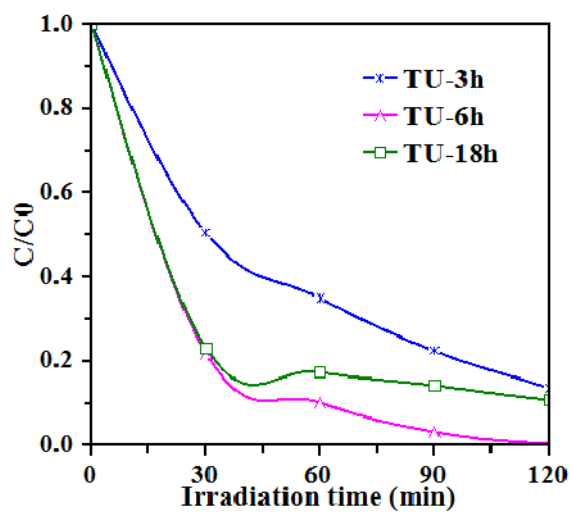

**Figure S7.** Photocatalytic degradation of Rh-B ( $2 \times 10^{-5}$  mol/L) over TU-3h, TU-6h and TU-18h

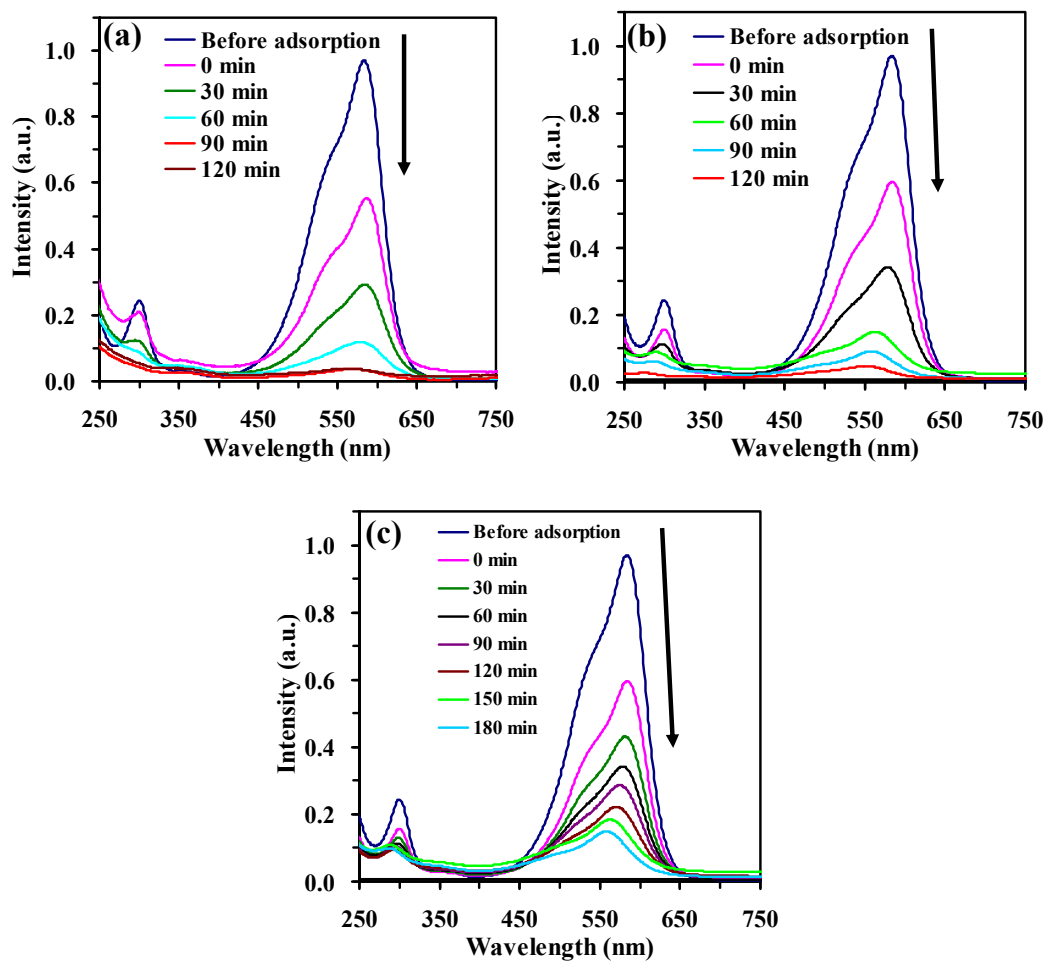

**Figure S8.** UV-vis absorption of crystal violet at different irradiation time over (a) PT-6h, (b) TU-6h and (c) Bi<sub>2</sub>S<sub>3</sub>

**Table S1.** Degradation rate constants for Rh-B and CV on the as prepared samples.

|      | k (min <sup>-1</sup> ) |        |        |        |        |                                |
|------|------------------------|--------|--------|--------|--------|--------------------------------|
|      | TU-6h                  | PT-6h  | ST-6h  | SS-6h  | CuS    | Bi <sub>2</sub> S <sub>3</sub> |
| Rh-B | 0.0388                 | 0.0348 | 0.0321 | 0.0016 | 0.0010 | 0.0011                         |
| CV   | 0.0398                 | 0.0412 | 0.0330 | 0.0197 | 0.0007 | 0.0112                         |

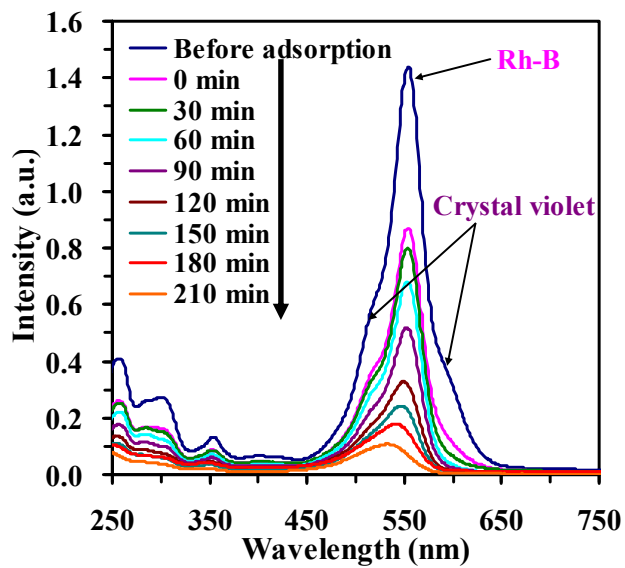

**Figure S9.** UV-vis absorption of Rh-B and crystal violet (mixed solution) at different irradiation time over PT-6h

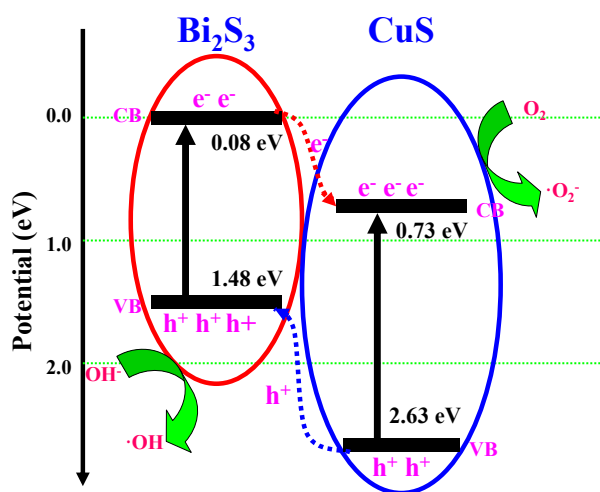

**Figure S10.** Band gap structures of CuS and  $\text{Bi}_2\text{S}_3$  and the possible process for the separation of charge carriers
